# Supplementary material
Source: Springer Nature journal article supplement (https://www.springermedizin.de/resource/supplementary/12939_2011_203_MOESM3_ESM.pdf/9550588)

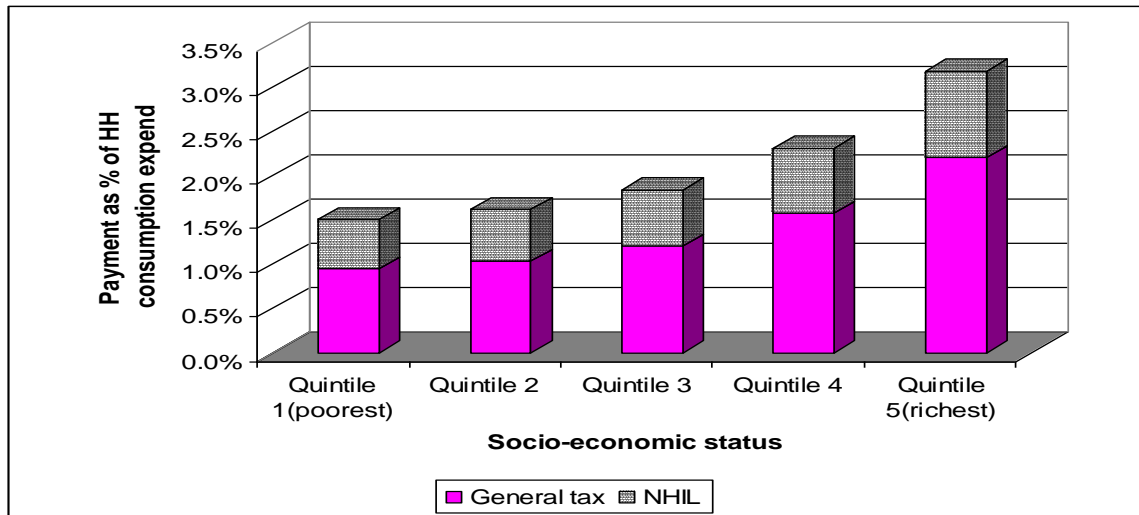

<sup>a</sup> Only portion (15%) of tax goes to health

Supplement: MOESM3 [file 9550588]
